# Supplementary material for: Symbiotic Bacterial Communities of Insects Feeding on the Same Plant Lineage: Distinct Composition but Congruent Function
Source: MDPI journal article supplement (doi:10.3390/insects15030187), 2024-03-12
Supplement: s1 [file s1]

## **Supplementary Materials**

### **Symbiotic Bacterial Communities of Insects Feeding on the Same Plant Lineage: Distinct Composition but Congruent Function**

**Waleed Afzal Naveed , Qian Liu , Congcong Lu and Xiaolei Huang \***

Key Laboratory of Ecological Pest Control for Fujian and Taiwan Crops, College of Plant Protection,  
Fujian Agriculture and Forestry University, Fuzhou 350002, China; waleedafzal75@gmail.com  
(W.A.N.); liuqian9502@163.com (Q.L.); lcchuaer613@126.com (C.L.)

\* Correspondence: huangxl@fafu.edu.cn; Tel.: +86-0591-83705205

**Table S1.** The Illumina HiSeq sequencing results of bacterial 16S rRNA gene. Raw tags = number of 16S rDNA sequences after merged the PE reads, Clean tags = number of 16S rDNA sequences after further quality filtering the Raw tags, Reads = number of 16S rDNA sequences after discard the OTUs with a number of sequences < 0.005% of the total number of sequences. See Table 1 for detailed sample information.

| Sample ID | Species Name                               | Raw Tags | Clean Tags | Reads |
|-----------|--------------------------------------------|----------|------------|-------|
| BWA1      | <i>Pseudoregma bambucicola</i><br>(Winter) | 79717    | 75425      | 74875 |
| BWA2      |                                            | 80141    | 75521      | 74932 |
| BWA3      |                                            | 79993    | 75575      | 75113 |
| BWC1      | <i>Purohita taiwanensis</i>                | 80153    | 75863      | 75571 |
| BWC2      |                                            | 79925    | 75441      | 75067 |
| BWC3      |                                            | 79880    | 75671      | 75454 |
| BWE1      | <i>Tropidocephala brunnipennis</i>         | 79675    | 75377      | 74788 |
| BWE2      |                                            | 80036    | 75789      | 75171 |
| BWE3      |                                            | 79893    | 75754      | 74591 |
| BWF1      | <i>Discophora sondaica</i>                 | 49054    | 46620      | 45956 |
| BWF2      |                                            | 42227    | 40081      | 39349 |
| BWF3      |                                            | 50268    | 47591      | 46325 |
| BWG1      | <i>Oligia apameoides</i>                   | 53964    | 51039      | 50236 |
| BWG2      |                                            | 46457    | 44084      | 41885 |
| BWG3      |                                            | 80037    | 76295      | 67808 |
| BWJ1      | <i>Ceratovacuna keduensis</i>              | 79844    | 75241      | 74241 |
| BWJ2      |                                            | 80167    | 75560      | 74555 |
| BWJ3      |                                            | 80413    | 75753      | 74727 |
| BWN1      | <i>Pseudoregma bambucicola</i><br>(Summer) | 80130    | 75704      | 74962 |
| BWN2      |                                            | 79950    | 75944      | 75077 |
| BWN3      |                                            | 80225    | 75699      | 74845 |
| BWO1      | <i>Takecallis taiwana</i>                  | 40894    | 38612      | 38306 |
| BWO2      |                                            | 55224    | 52353      | 52087 |
| BWO3      |                                            | 82586    | 78144      | 77892 |
| BWQ1      | <i>Ceratoglyphina styracicola</i>          | 80086    | 76126      | 75873 |
| BWQ2      |                                            | 80090    | 75533      | 75037 |
| BWQ3      |                                            | 80121    | 75565      | 75006 |
| BWT1      | <i>Reticulitermes flaviceps</i>            | 80041    | 75876      | 75319 |
| BWT2      |                                            | 80054    | 75791      | 75106 |
| BWT3      |                                            | 79802    | 75494      | 74241 |
| BWV1      | <i>Antonina pretiosa</i>                   | 79994    | 75525      | 74643 |
| BWV2      |                                            | 79909    | 75406      | 74317 |
| BWV3      |                                            | 79985    | 75727      | 74134 |

**Table S2.** Detailed information of symbionts diversity indices of all samples. OTUs, number of operational taxonomic units at a 0.03 cut-off; ACE and Chao1, estimates of species richness; Simpson and Shannon, estimates of diversity; Coverage, the probability of species being measured in the sample. See Table 1 for detailed sample information.

| Sample ID | Species Name                       | OTUs | ACE    | Chao1  | Simpson | Shannon | Coverage |
|-----------|------------------------------------|------|--------|--------|---------|---------|----------|
| BWA1      | <i>Pseudoregma</i>                 | 143  | 174.42 | 180.40 | 0.42    | 1.37    | 0.95     |
| BWA2      | <i>bambucicola</i>                 | 141  | 189.92 | 194.45 | 0.19    | 0.76    | 0.93     |
| BWA3      | (Winter)                           | 145  | 184.12 | 196.75 | 0.18    | 0.72    | 0.94     |
| BWC1      | <i>Purohita taiwanensis</i>        | 169  | 434.50 | 418.00 | 0.23    | 0.90    | 0.99     |
| BWC2      |                                    | 177  | 224.50 | 220.24 | 0.44    | 1.57    | 0.94     |
| BWC3      |                                    | 78   | 89.73  | 97.43  | 0.21    | 0.80    | 0.98     |
| BWE1      | <i>Tropidocephala brunnipennis</i> | 110  | 201.32 | 157.05 | 0.63    | 1.79    | 0.94     |
| BWE2      |                                    | 115  | 172.92 | 172.50 | 0.60    | 1.79    | 0.94     |
| BWE3      |                                    | 123  | 230.76 | 178.43 | 0.65    | 1.88    | 0.93     |
| BWF1      | <i>Discophora sondaica</i>         | 165  | 294.82 | 231.00 | 0.67    | 3.60    | 0.92     |
| BWF2      |                                    | 127  | 148.66 | 136.33 | 0.80    | 4.55    | 0.98     |
| BWF3      |                                    | 170  | 310.44 | 213.50 | 0.72    | 4.04    | 0.93     |
| BWG1      | <i>Oligia apameoides</i>           | 145  | 147.03 | 146.50 | 0.72    | 3.45    | 0.99     |
| BWG2      |                                    | 109  | 116.50 | 116.20 | 0.81    | 3.55    | 0.98     |
| BWG3      |                                    | 173  | 190.24 | 198.67 | 0.81    | 3.48    | 0.96     |
| BWJ1      | <i>Ceratovacuna keduensis</i>      | 176  | 221.87 | 225.00 | 0.16    | 0.68    | 0.93     |
| BWJ2      |                                    | 184  | 236.87 | 239.19 | 0.26    | 0.84    | 0.92     |
| BWJ3      |                                    | 202  | 255.74 | 279.00 | 0.24    | 0.95    | 0.92     |
| BWN1      | <i>Pseudoregma</i>                 | 273  | 367.63 | 356.44 | 0.40    | 1.39    | 0.98     |
| BWN2      | <i>bambucicola</i>                 | 71   | 89.08  | 96.30  | 0.40    | 1.16    | 0.97     |
| BWN3      | (Summer)                           | 258  | 369.04 | 397.79 | 0.42    | 1.43    | 0.98     |
| BWO1      | <i>Takecallis taiwana</i>          | 64   | 74.86  | 69.00  | 0.12    | 0.64    | 0.98     |
| BWO2      |                                    | 104  | 121.81 | 119.11 | 0.13    | 0.69    | 0.97     |
| BWO3      |                                    | 58   | 63.83  | 63.14  | 0.02    | 0.13    | 0.99     |
| BWQ1      | <i>Ceratoglyphina styracicola</i>  | 76   | 84.45  | 89.00  | 0.51    | 1.13    | 0.98     |
| BWQ2      |                                    | 226  | 343.71 | 343.00 | 0.52    | 1.30    | 0.98     |
| BWQ3      |                                    | 226  | 310.91 | 321.29 | 0.43    | 1.16    | 0.99     |
| BWT1      | <i>Reticulitermes flaviceps</i>    | 372  | 420.09 | 418.41 | 0.95    | 6.02    | 0.92     |
| BWT2      |                                    | 396  | 430.41 | 443.30 | 0.94    | 6.17    | 0.93     |
| BWT3      |                                    | 517  | 544.25 | 550.78 | 0.96    | 6.64    | 0.92     |
| BWV1      | <i>Antonina pretiosa</i>           | 303  | 331.59 | 349.87 | 0.95    | 5.85    | 0.94     |
| BWV2      |                                    | 338  | 455.91 | 446.50 | 0.92    | 5.58    | 0.91     |
| BWV3      |                                    | 326  | 383.98 | 425.75 | 0.90    | 5.30    | 0.92     |

**Table S3.** Percentage of relative abundance of top ten major symbiotic bacteria in all samples.

| Sample ID | Insect Specie                      | Insect Order | <i>Buchnera</i> | Rhizobiaceae | <i>Wolbachia</i> | <i>Treponema</i> | <i>Acinetobacter</i> | <i>Candidatus_Vidani</i><br><i>a</i> | <i>Serratia</i> | <i>Sphingomonas</i> | Asaia | Klebsiella | Unassign | Others |
|-----------|------------------------------------|--------------|-----------------|--------------|------------------|------------------|----------------------|--------------------------------------|-----------------|---------------------|-------|------------|----------|--------|
| BWA1      | <i>Pseudoregma</i>                 | Hemiptera    | 92.40           | 0.23         | 0.64             | 0.02             | 0.01                 | 0.05                                 | 5.54            | 0.09                | 0.00  | 0.29       | 0.62     | 0.11   |
| BWA2      | <i>bambucicola</i>                 |              | 93.17           | 0.16         | 0.74             | 0.00             | 0.01                 | 0.01                                 | 5.09            | 0.06                | 0.00  | 0.20       | 0.47     | 0.10   |
| BWA3      | (Winter)                           |              | 93.98           | 0.15         | 0.55             | 0.00             | 0.01                 | 0.02                                 | 4.52            | 0.05                | 0.00  | 0.22       | 0.43     | 0.07   |
| BWN1      | <i>Pseudoregma</i>                 |              | 87.48           | 0.12         | 10.62            | 0.08             | 0.07                 | 0.00                                 | 0.07            | 0.17                | 0.00  | 0.54       | 0.77     | 0.07   |
| BWN3      | <i>bambucicola</i>                 |              | 88.07           | 0.19         | 9.68             | 0.09             | 0.12                 | 0.00                                 | 0.10            | 0.20                | 0.02  | 0.69       | 0.79     | 0.05   |
| BWN2      | (Summer)                           |              | 88.02           | 0.02         | 11.77            | 0.00             | 0.02                 | 0.00                                 | 0.01            | 0.00                | 0.00  | 0.02       | 0.12     | 0.01   |
| BWJ1      | <i>Ceratovacuna keduensis</i>      |              | 97.34           | 0.05         | 1.50             | 0.00             | 0.01                 | 0.00                                 | 0.02            | 0.12                | 0.00  | 0.45       | 0.43     | 0.07   |
| BWJ2      |                                    |              | 97.94           | 0.09         | 0.98             | 0.02             | 0.02                 | 0.00                                 | 0.00            | 0.12                | 0.00  | 0.41       | 0.37     | 0.05   |
| BWJ3      |                                    |              | 97.07           | 0.12         | 1.39             | 0.01             | 0.04                 | 0.00                                 | 0.00            | 0.17                | 0.00  | 0.46       | 0.67     | 0.06   |
| BWO1      | <i>Takecallis taiwana</i>          |              | 96.87           | 0.09         | 0.00             | 0.00             | 0.06                 | 0.00                                 | 0.00            | 0.36                | 0.00  | 0.33       | 2.03     | 0.26   |
| BWO2      |                                    |              | 97.48           | 0.12         | 0.03             | 0.00             | 0.06                 | 0.00                                 | 0.00            | 0.37                | 0.05  | 0.16       | 1.57     | 0.16   |
| BWO3      |                                    |              | 99.45           | 0.02         | 0.01             | 0.00             | 0.01                 | 0.00                                 | 0.00            | 0.02                | 0.00  | 0.06       | 0.43     | 0.00   |
| BWQ1      | <i>Ceratoglyphin a styracicola</i> |              | 45.02           | 0.01         | 0.00             | 0.00             | 0.01                 | 0.00                                 | 54.53           | 0.03                | 0.00  | 0.05       | 0.36     | 0.00   |
| BWQ2      |                                    |              | 51.56           | 0.11         | 0.02             | 0.08             | 0.02                 | 0.00                                 | 47.03           | 0.11                | 0.00  | 0.50       | 0.53     | 0.04   |
| BWQ3      |                                    |              | 71.55           | 0.08         | 0.02             | 0.05             | 0.00                 | 0.00                                 | 27.20           | 0.13                | 0.00  | 0.45       | 0.44     | 0.07   |
| BWC1      | <i>Purohita taiwanensis</i>        |              | 0.14            | 79.04        | 1.30             | 0.00             | 0.05                 | 18.51                                | 0.01            | 0.04                | 0.01  | 0.29       | 0.54     | 0.06   |
| BWC2      |                                    |              | 4.03            | 80.30        | 0.65             | 0.03             | 0.01                 | 13.35                                | 0.16            | 0.15                | 0.00  | 0.28       | 0.97     | 0.09   |
| BWC3      |                                    |              | 2.49            | 92.28        | 1.19             | 0.00             | 0.01                 | 3.57                                 | 0.10            | 0.04                | 0.00  | 0.03       | 0.23     | 0.06   |
| BWE1      | <i>Tropidocepha</i>                |              | 0.00            | 51.64        | 3.04             | 0.00             | 0.01                 | 10.78                                | 0.00            | 0.04                | 34.13 | 0.16       | 0.17     | 0.03   |
| BWE2      | <i>la</i>                          |              | 0.02            | 61.48        | 4.96             | 0.00             | 0.05                 | 6.74                                 | 0.00            | 0.04                | 26.18 | 0.26       | 0.23     | 0.03   |
| BWE3      | <i>brunnipennis</i>                |              | 0.00            | 45.45        | 3.81             | 0.00             | 0.02                 | 8.60                                 | 0.00            | 0.06                | 41.56 | 0.28       | 0.18     | 0.03   |

|      |                                 |             |           |      |      |      |       |      |      |       |      |       |       |       |      |
|------|---------------------------------|-------------|-----------|------|------|------|-------|------|------|-------|------|-------|-------|-------|------|
| BWV1 | <i>Antonina pretiosa</i>        |             | 10.80     | 2.84 | 0.16 | 0.03 | 0.04  | 0.01 | 0.00 | 43.23 | 0.04 | 0.31  | 42.45 | 0.08  |      |
| BWV2 |                                 |             | 3.59      | 2.39 | 0.10 | 0.05 | 0.16  | 0.01 | 0.00 | 51.20 | 0.03 | 0.54  | 41.83 | 0.08  |      |
| BWV3 |                                 |             | 6.26      | 2.01 | 0.11 | 0.05 | 0.08  | 0.01 | 0.00 | 60.15 | 0.04 | 0.55  | 30.65 | 0.09  |      |
| BWG1 | <i>Oligia apameoides</i>        | Lepidoptera | 0.10      | 0.02 | 0.00 | 0.00 | 11.43 | 0.00 | 0.73 | 0.78  | 0.00 | 71.03 | 12.89 | 3.03  |      |
| BWG2 |                                 |             | 0.02      | 0.09 | 0.00 | 0.00 | 65.37 | 0.00 | 4.64 | 0.54  | 0.00 | 21.49 | 6.04  | 1.81  |      |
| BWG3 |                                 |             | 0.13      | 0.02 | 0.01 | 0.00 | 58.66 | 0.00 | 1.58 | 0.23  | 0.00 | 35.89 | 2.55  | 0.94  |      |
| BWF1 | <i>Discophora sondaica</i>      |             | 0.09      | 0.02 | 0.08 | 0.00 | 0.02  | 0.00 | 1.22 | 1.38  | 0.19 | 1.24  | 84.27 | 11.48 |      |
| BWF2 |                                 |             | 0.11      | 0.69 | 0.01 | 0.00 | 0.01  | 0.00 | 0.95 | 1.76  | 0.07 | 0.94  | 85.77 | 9.69  |      |
| BWF3 |                                 |             | 0.08      | 0.41 | 0.57 | 0.00 | 0.29  | 0.00 | 1.82 | 2.68  | 0.00 | 2.09  | 83.93 | 8.14  |      |
| BWT1 | <i>Reticulitermes flaviceps</i> |             | Blattodea | 0.56 | 0.16 | 0.01 | 69.55 | 0.08 | 0.00 | 0.07  | 0.16 | 0.00  | 0.62  | 28.71 | 0.09 |
| BWT2 |                                 |             |           | 0.46 | 0.20 | 0.04 | 68.81 | 0.10 | 0.00 | 0.08  | 0.35 | 0.00  | 0.83  | 28.95 | 0.17 |
| BWT3 |                                 |             |           | 0.26 | 1.15 | 0.29 | 64.35 | 0.22 | 0.00 | 0.00  | 2.18 | 0.00  | 4.83  | 26.30 | 0.40 |

**Table S4.** Percentage of relative abundance and their number of reads of commonly shared unique symbiotic bacteria in all samples.

| Sr.<br>No. | Order                 | Family            | Genus            | OTU_id  | Hemiptera                               |                                         |                             |                                    |                               |                           |                                   |                        | Lepidoptera              |                            | Blattodea                       |
|------------|-----------------------|-------------------|------------------|---------|-----------------------------------------|-----------------------------------------|-----------------------------|------------------------------------|-------------------------------|---------------------------|-----------------------------------|------------------------|--------------------------|----------------------------|---------------------------------|
|            |                       |                   |                  |         | <i>Pseudoregma bambucicola</i> (Winter) | <i>Pseudoregma bambucicola</i> (Summer) | <i>Purohita taiwanensis</i> | <i>Tropidocephala brunnipennis</i> | <i>Ceratovacuna keduensis</i> | <i>Takecallis taiwana</i> | <i>Ceratoglyphina styracicola</i> | <i>Antoniapretiosa</i> | <i>Oligia apameoides</i> | <i>Discophora sondaica</i> | <i>Reticulitermes flaviceps</i> |
| 1          | Acidobacteriales      | Acidobacteriaceae | Acidobacterium   | OTU2703 | 10                                      | 5                                       | 15                          | 3                                  | 5                             | 9<br>(0.29%)              | 14 (0.69%)                        | 2                      | 107<br>(0.14%)           | 68                         | 5                               |
| 2          | Burkholderiales       | Alcaligenaceae    | Achromobacter    | OTU155  | 8                                       | 8                                       | 16                          | 1                                  | 15                            | 34<br>(1.09%)             | 13 (0.64%)                        | 9                      | 301<br>(0.39%)           | 1                          | 13 (0.21%)                      |
| 3          |                       | Nitrosomonadaceae | MND1             | OTU1113 | 5                                       | 2                                       | 8                           | 1                                  | 7                             | 26<br>(0.83%)             | 2                                 | 7                      | 1                        | 66                         | 16 (0.25%)                      |
| 4          |                       | Comamonadaceae    | Ramlibacter      | OTU1560 | 3                                       | 6                                       | 3                           | 6                                  | 21                            | 6<br>(0.19%)              | 4                                 | 9                      | 7                        | 24                         | 46 (0.73%)                      |
| 5          |                       | TRA3 20           | -                | OTU473  | 1                                       | 2                                       | 1                           | 2                                  | 6                             | 13                        | 11                                | 1                      | 112<br>(0.14%)           | 61                         | 3                               |
| 6          | Caulobacteriales      | Caulobacteraceae  | Phenylobacterium | OTU660  | 1                                       | 4                                       | 5                           | 3                                  | 25                            | 28<br>(0.90%)             | 4                                 | 621<br>(0.95%)         | 55                       | 1                          | 17 (0.27%)                      |
| 7          | Chloroflexi           | -                 | -                | OTU270  | 1                                       | 1                                       | 15                          | 2                                  | 2                             | 1                         | 1                                 | 4                      | 181<br>(0.23%)           | 87                         | 2                               |
| 8          | Clostridia<br>UCG_014 | -                 | -                | OTU1426 | 5                                       | 8                                       | 14                          | 2                                  | 8                             | 24<br>(0.77%)             | 6                                 | 4                      | 2                        | 11                         | 47 (0.74%)                      |

|    |                  |                    |                           |        |                    |                    |                 |             |                    |                  |                 |                  |                   |                  |               |
|----|------------------|--------------------|---------------------------|--------|--------------------|--------------------|-----------------|-------------|--------------------|------------------|-----------------|------------------|-------------------|------------------|---------------|
| 9  | Clostridiales    | Clostridiaceae     | Clostridium_sensu_stricto | OTU140 | 1                  | 18                 | 2               | 2           | 13                 | 108<br>(3.46%)   | 3               | 11               | 382<br>(0.49%)    | 148              | 19            |
| 10 | Cyanobacteriales | -                  | -                         | OTU66  | 648<br>(0.39%)     | 3                  | 334<br>(0.18%)  | 145 (0.13%) | 103                | 22<br>(0.71%)    | 1               | 12               | 1                 | 3                | 5             |
| 11 |                  | -                  | -                         | OTU6   | 3                  | 3                  | 64              | 3           | 22                 | 74<br>(2.37%)    | 27 (1.33%)      | 28               | 60819<br>(77.98%) | 2497 (0.40%)     | 5             |
| 12 | Enterobacterales | Morganellaceae     | Buchnera                  | OTU1   | 197773<br>(95.61%) | 165978<br>(86.63%) | 4545<br>(2.51%) | 18          | 190760<br>(98.46%) | 1149<br>(36.83%) | 471<br>(23.25%) | 9680<br>(14.79%) | 43                | 73               | 420 (6.63%)   |
| 13 |                  | Enterococcaceae    | Escherichia_Shigella      | OTU47  | 28                 | 81                 | 115             | 33          | 117                | 31<br>(0.99%)    | 31 (1.53%)      | 47               | 965<br>(1.24%)    | 340              | 87 (1.37%)    |
| 14 |                  | Enterobacteriaceae | klebsiella                | OTU68  | 274<br>(0.13%)     | 45                 | 173<br>(0.10%)  | 35          | 372<br>(0.19%)     | 24<br>(0.77%)    | 38 (1.88%)      | 79<br>(0.12%)    | 189<br>(0.24%)    | 6647 (1.08%)     | 125 (1.97%)   |
| 15 |                  |                    |                           | OTU12  | 25                 | 17                 | 46              | 6           | 30                 | 16<br>(0.51%)    | 19 (0.94%)      | 7                | 164<br>(0.21%)    | 34839<br>(5.65%) | 55 (0.87%)    |
| 16 |                  |                    |                           | OTU39  | 195                | 403<br>(0.21%)     | 183             | 452 (0.40%) | 463<br>(0.24%)     | 198<br>(6.35%)   | 364<br>(17.97%) | 413<br>(0.63%)   | 1001<br>(1.28%)   | 932(0.15%)       | 1708 (26.94%) |
| 17 |                  | Pectobacteriaceae  | Pectobacterium            | OTU23  | 6342<br>(3.07%)    | 23605<br>(12.32%)  | 43              | 5           | 4                  | 116<br>(3.72%)   | 30 (1.48%)      | 584<br>(0.89%)   | 102<br>(0.13%)    | 6                | 35 (0.55%)    |
| 18 | Frankiales       | -                  | -                         | OTU567 | 6                  | 14                 | 8               | 4           | 6                  | 9<br>(0.29%)     | 11 (0.54%)      | 408<br>(0.62%)   | 1                 | 96               | 77 (1.21%)    |

|    |                        |                       |                     |         |                |                |                |             |                |               |             |                |                |              |              |
|----|------------------------|-----------------------|---------------------|---------|----------------|----------------|----------------|-------------|----------------|---------------|-------------|----------------|----------------|--------------|--------------|
| 19 | Gemmatimonadales       | Gemmatimonadaceae     | Gemmatirosa         | OTU1847 | 7              | 7              | 5              | 2           | 7              | 80<br>(2.56%) | 2           | 5              | 9              | 53           | 5            |
| 20 | Holophagae, Subgroup 7 | -                     | -                   | OTU194  | 1              | 6              | 1              | 1           | 1              | 11<br>(0.35%) | 4 (0.20%)   | 1              | 412<br>(0.53%) | 48           | 14 (0.22%)   |
| 21 | Lactobacillales        | Enterococcaceae       | Enterococcus        | OTU29   | 548<br>(0.26%) | 437<br>(0.23%) | 858<br>(0.47%) | 270 (0.24%) | 642<br>(0.33%) | 63<br>(2.02%) | 196 (9.67%) | 853<br>(1.30%) | 111<br>(0.14%) | 438          | 907 (14.31%) |
| 22 |                        | Lactobacillaceae      | Lactiplantibacillus | OTU170  | 3              | 30             | 99             | 3           | 97             | 40<br>(1.28%) | 30 (1.48%)  | 1              | 501<br>(0.64%) | 301          | 24 (0.38%)   |
| 23 |                        |                       | Lactobacillus       | OTU127  | 22             | 16             | 96             | 9           | 29             | 120(3.85%)    | 24 (1.18%)  | 2              | 337<br>(0.43%) | 671 (0.11%)  | 139 (2.19%)  |
| 24 |                        |                       |                     | OTU189  | 9              | 20             | 108            | 1           | 63             | 95<br>(3.04%) | 33 (1.63%)  | 3              | 126<br>(0.16%) | 138          | 108 (1.70%)  |
| 25 |                        |                       | Ligilactobacillus   | OTU146  | 2              | 17             | 89             | 3           | 61             | 4<br>(0.13%)  | 22 (1.09%)  | 6              | 21             | 625 (0.10%)  | 53 (0.84%)   |
| 26 |                        | Streptococcaceae      | Streptococcus       | OTU178  | 7              | 27             | 3              | 9           | 24             | 5<br>(0.16%)  | 3 (0.15%)   | 2              | 232<br>(0.30%) | 20           | 31 (0.49%)   |
| 27 | Micrococcales          | Micrococcaceae        | Arthrobacter        | OTU83   | 55             | 95             | 62             | 42          | 195            | 41<br>(1.31%) | 88 (4.34%)  | 168<br>(0.26%) | 201<br>(0.26%) | 166          | 382 (6.03%)  |
| 28 | Peptostreptococcales   | Peptostreptococcaceae | Romboutsia          | OTU177  | 3              | 24             | 29             | 14          | 14             | 18<br>(0.58%) | 30 (1.48%)  | 33             | 282<br>(0.36%) | 255          | 18 (0.28%)   |
| 29 | Pseudomonadales        | Pseudomonadaceae      | Pseudomonas         | OTU22   | 81             | 10             | 37             | 490 (0.44%) | 93             | 33<br>(1.06%) | 24 (1.18%)  | 27             | 152<br>(0.19%) | 8003 (1.30%) | 62 (0.98%)   |



|    |                  |                   |                 |             |                |    |                    |                    |    |                |            |                        |                |              |             |
|----|------------------|-------------------|-----------------|-------------|----------------|----|--------------------|--------------------|----|----------------|------------|------------------------|----------------|--------------|-------------|
| 30 |                  |                   |                 | OTU49       | 32             | 5  | 33                 | 4                  | 14 | 1              | 7 (0.35%)  | 10                     | 7              | 2398 (0.39%) | 7 (0.11%)   |
| 31 |                  |                   |                 | OTU37<br>57 | 20             | 19 | 16                 | 15                 | 11 | 16<br>(0.51%)  | 7 (0.35%)  | 36                     | 19             | 8            | 36 (0.57%)  |
| 32 | Rhizobiales      | Rhizobiaceae      | -               | OTU2        | 304<br>(0.15%) | 27 | 173730<br>(95.89%) | 110656<br>(98.41%) | 21 | 5<br>(0.16%)   | 1          | 126<br>(0.19%)<br>)    | 16             | 17           | 27 (0.43%)  |
| 33 |                  |                   | -               | OTU25<br>0  | 10             | 25 | 11                 | 18                 | 27 | 34<br>(1.09%)  | 9 (0.44%)  | 178<br>(0.27%)<br>)    | 132<br>(0.17%) | 1            | 99 (1.56%)  |
| 34 |                  |                   | -               | OTU46<br>1  | 3              | 9  | 2                  | 1                  | 4  | 14<br>(0.45%)  | 11 (0.54%) | 7                      | 88<br>(0.11%)  | 19           | 7 (0.11%)   |
| 35 |                  | Xanthobacteraceae | -               | OTU41       | 30             | 20 | 27                 | 12                 | 51 | 27<br>(0.87%)  | 52 (2.57%) | 2378<br>(3.63%)<br>)   | 49             | 166          | 63 (0.99%)  |
| 36 |                  |                   | -               | OTU24<br>12 | 7              | 2  | 6                  | 4                  | 8  | 57<br>(1.83%)  | 3 (0.15%)  | 10                     | 6              | 4            | 21 (0.33%)  |
| 37 | Sphingomonadales | Sphingomonadaceae | Novosphingobium | OTU56<br>1  | 20             | 11 | 5                  | 3                  | 19 | 71<br>(2.28%)  | 21 (1.04%) | 308<br>(0.47%)<br>)    | 2              | 26           | 59 (0.93%)  |
| 38 |                  |                   | Sphingomonas    | OTU21       | 48             | 77 | 44                 | 51                 | 79 | 126<br>(4.04%) | 72 (3.55%) | 48554<br>(74.17%)<br>) | 856<br>(1.10%) | 251          | 463 (7.30%) |
| 39 |                  |                   |                 | OTU26<br>81 | 29             | 43 | 62                 | 18                 | 57 | 12<br>(0.38%)  | 41 (2.02%) | 71<br>(0.11%)<br>)     | 13             | 50           | 133 (2.10%) |

|    |                       |                   |                |             |     |                |     |    |     |                |                 |                    |                  |              |              |
|----|-----------------------|-------------------|----------------|-------------|-----|----------------|-----|----|-----|----------------|-----------------|--------------------|------------------|--------------|--------------|
| 40 |                       |                   |                | OTU24<br>8  | 4   | 7              | 2   | 3  | 10  | 8<br>(0.26%)   | 10 (0.49%)      | 301<br>(0.46%<br>) | 183<br>(0.23%)   | 1            | 13 (0.21%)   |
| 41 | Staphylococcales      | Staphylococcaceae | Staphylococcus | OTU13<br>6  | 25  | 48             | 90  | 3  | 42  | 64<br>(2.05%)  | 7 (0.35%)       | 43                 | 576<br>(0.74%)   | 332          | 24 (0.38%)   |
| 42 | unclassified_Bacteria |                   |                | OTU18       | 167 | 84             | 124 | 58 | 113 | 166<br>(5.32%) | 60 (2.96%)      | 118<br>(0.18%<br>) | 9102<br>(11.67%) | 1616 (0.26%) | 244 (3.85%)  |
| 43 |                       |                   |                | OTU25<br>71 | 88  | 321<br>(0.17%) | 42  | 31 | 92  | 121<br>(3.88%) | 219<br>(10.81%) | 297<br>(0.45%<br>) | 123<br>(11.67%)  | 153          | 715 (11.28%) |

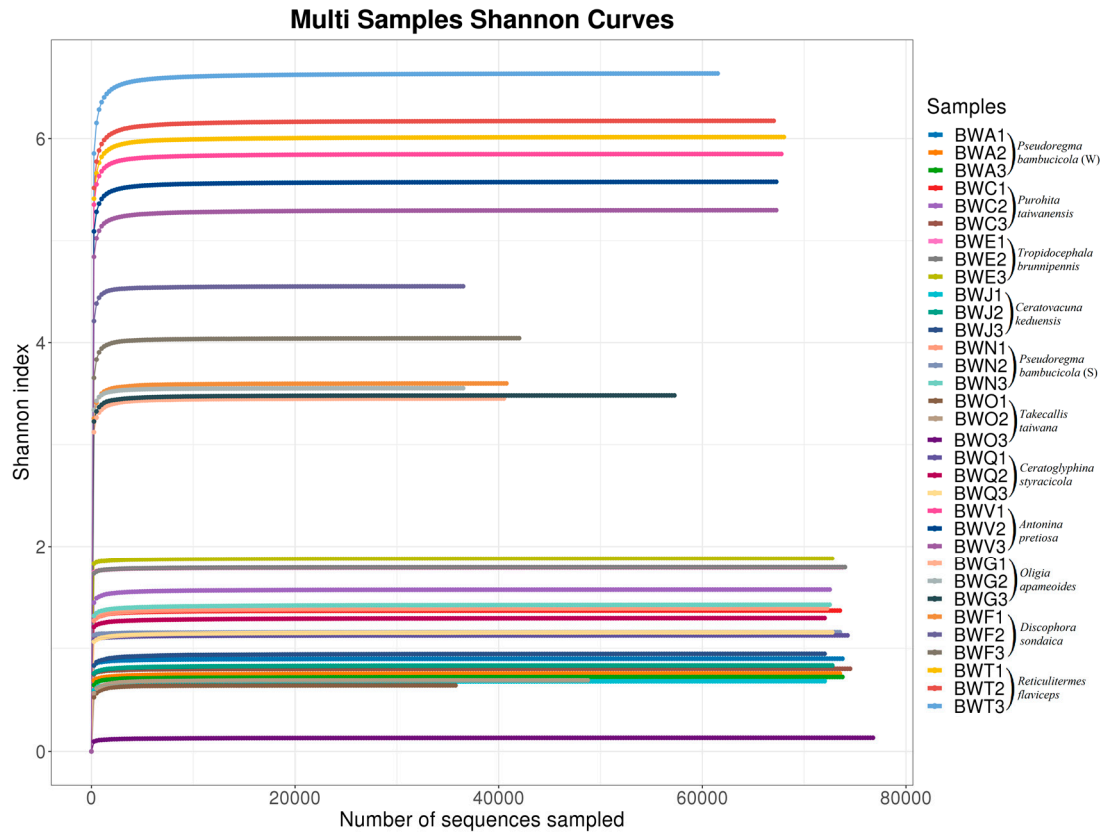

**Figure S1.** Shannon rarefaction curves for all samples.

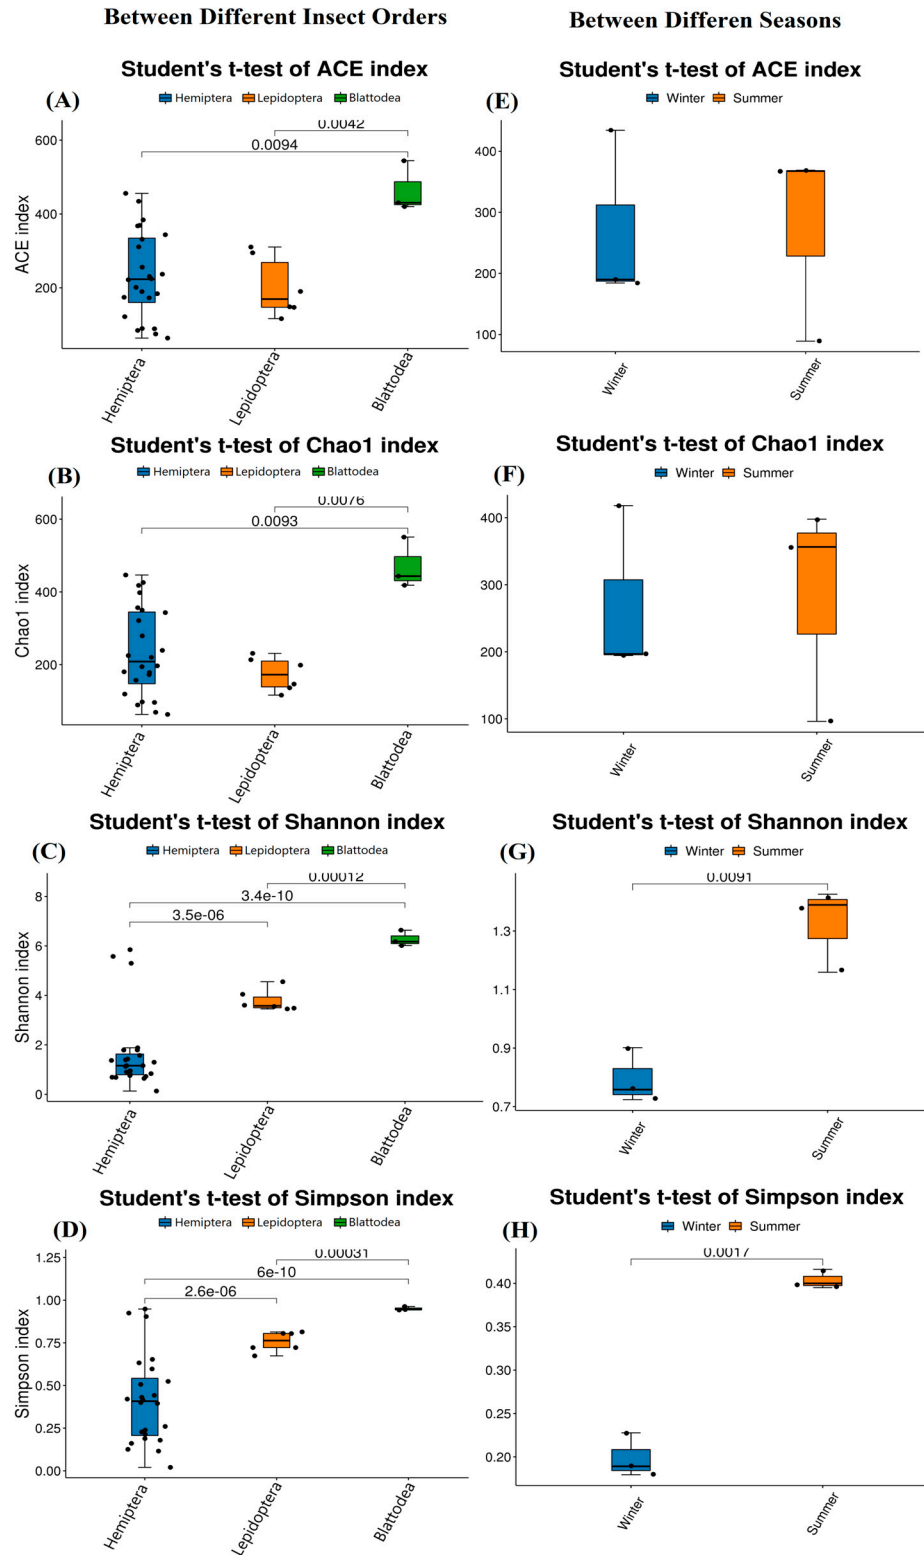

**Figure S2.** Comparison of the bacterial communities' alpha diversity. Between different insect orders; (A) ACE index, (B) Chao1 index, (C) Shannon index, (D) Simpson index, Between different seasons; (E) ACE index, (F) Chao1 index, (G) Shannon index, (H) Simpson index. Note: X-axis: Group name; Y-axis: Alpha diversity indices. The line inside the boxplots represent medians, the dots in the center are the means and the whiskered bars are maximal and minimal values. The value indicates P-value calculated by t-test (If the P value > 0.05).

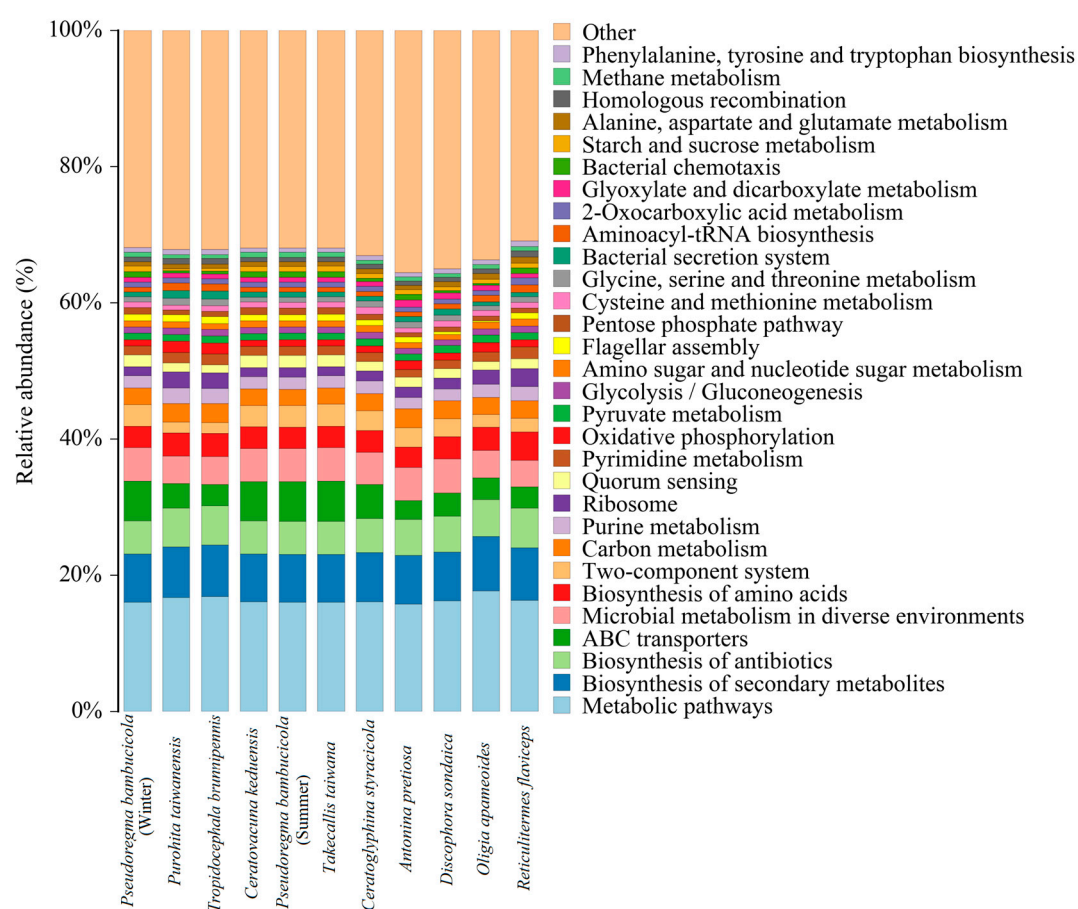

**Figure S3.** Relative abundance of predicted genes in top 30 abundant pathways identified in the symbiotic bacterial communities of *Bambusa* feeding insects by the PICRUSt2 analysis. The pathways are presented according to KEGGs.

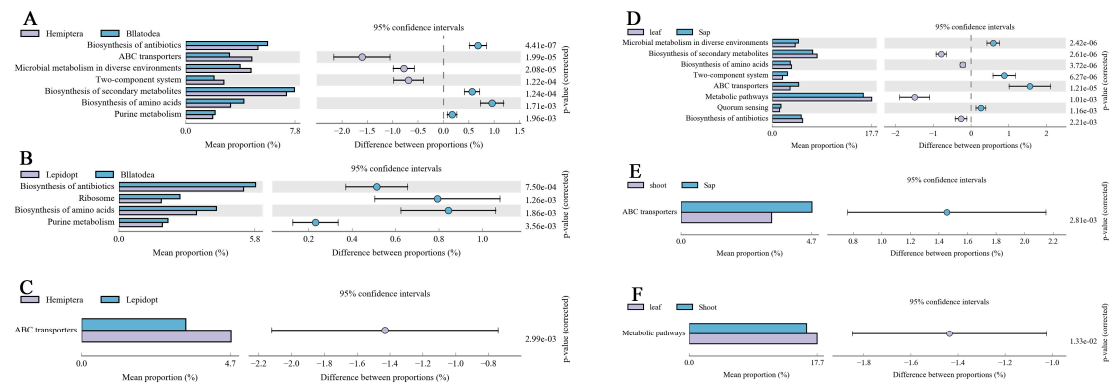

**Figure S4.** T-test results of top ten abundant pathways for the comparison of three different insect orders and diet. Only shown the pathways that with significant differences in relative abundance. See Table 1 for detailed sample information
